# Supplementary material for: Trail (TNF-related apoptosis-inducing ligand) induces an inflammatory response in human adipocytes
Source: PubMed Central journal article supplement (PMC5515939; doi:10.1038/s41598-017-05932-7), 2017-07-18
Supplement: 41598_2017_5932_MOESM1_ESM.pdf [file 41598_2017_5932_MOESM1_ESM.pdf]

## Supplementary Appendix

### TRAIL (TNF-related apoptosis-inducing ligand) induces an inflammatory response in human adipocytes

Verena Zoller <sup>1</sup>, Jan-Bernd Funcke <sup>1</sup>, Julian Roos <sup>1</sup>, Meike Dahlhaus <sup>1</sup>, Muad Abd El Hay <sup>1</sup>, Karlheinz Holzmann <sup>2</sup>, Ralf Marienfeld <sup>3</sup>, Thomas Kietzmann <sup>4</sup>, Klaus-Michael Debatin <sup>5</sup>, Martin Wabitsch <sup>1</sup>, and Pamela Fischer-Posovszky <sup>1</sup>

#### Affiliations

<sup>1</sup> Division of Pediatric Endocrinology and Diabetes, Department of Pediatric and Adolescent Medicine, University Medical Center Ulm, Ulm, Germany;

<sup>2</sup> Core Facility Genomics, Ulm University, Ulm, Germany;

<sup>3</sup> Institute of Pathology, Ulm University, Ulm, Germany; Department of Pediatric and Adolescent Medicine, University Medical Center Ulm, Ulm, Germany;

<sup>4</sup> Faculty of Biochemistry and Molecular Medicine and Biocenter Oulu, University of Oulu, Oulu, Finland;

<sup>5</sup> Department of Pediatric and Adolescent Medicine, University Medical Center Ulm, Ulm, Germany

#### Corresponding author

Pamela Fischer-Posovszky, PhD

Division of Pediatric Endocrinology and Diabetes

Department of Pediatric and Adolescent Medicine

University Medical Center Ulm

Eythstr. 24

89075 Ulm

Phone: +49 (0)731 500 57415

Email: [pamela.fischer@uniklinik-ulm.de](mailto:pamela.fischer@uniklinik-ulm.de)

### Supplementary Table 1

SGBS preadipocytes were treated with TRAIL (30 ng/ml) or vehicle for 12 hours. RNA was harvested and subjected to mRNA array analysis (Affymetrix, GeneChip Human Gene 1.0 ST Array). This table displays the genes that were differentially regulated by TRAIL in preadipocytes. Downregulated genes are given in dark green, upregulated genes in red.

| Probe Set | Gene                | Fold-change<br>TRAIL vs veh. | Parametric p-<br>value |
|-----------|---------------------|------------------------------|------------------------|
| 8148059   | DEPTOR              | 0.45                         | 0.0008639              |
| 8048749   | KCNE4               | 0.48                         | 0.0002156              |
| 8054254   | AFF3                | 0.57                         | 0.0024321              |
| 7964733   | RPSAP52             | 1.89                         | 0.0015996              |
| 8160435   | IFNE                | 1.96                         | 0.0090086              |
| 8015221   | KRTAP4-<br>11       | 2.04                         | 0.0012079              |
| 8065353   | THBD                | 2.08                         | 0.000115               |
| 8160439   | MIR31               | 2.08                         | 0.0041807              |
| 8105267   | ITGA2               | 2.13                         | 0.0000562              |
| 8143127   | FAM180A             | 2.13                         | 0.0000897              |
| 8054344   | RFX8                | 2.13                         | 0.0007926              |
| 8114797   | SPRY4               | 2.17                         | 0.0000004              |
| 8015223   | KRTAP4-<br>12       | 2.17                         | 0.000478               |
| 8019565   | KRTAP4-<br>12       | 2.17                         | 0.000478               |
| 8015218   | KRTAP4-7<br>KRTAP4- | 2.17                         | 0.0006165              |
| 8015230   | 12                  | 2.17                         | 0.0007172              |
| 8021635   | SERPINB2            | 2.22                         | 0.0005665              |
| 8006433   | CCL2                | 2.27                         | 0.0001043              |
| 7928429   | PLAU                | 2.33                         | 0.0000703              |
| 8112045   | ESM1                | 2.33                         | 0.000125               |
| 8154233   | CD274               | 2.38                         | 0.0000764              |
| 8025402   | ANGPTL4             | 2.38                         | 0.0001774              |
| 8052872   | TGFA                | 2.44                         | 0.0000084              |
| 7951271   | MMP1                | 2.44                         | 0.0004807              |
| 8095688   | CXCL6               | 2.50                         | 0.0000193              |
| 8092726   | CLDN1               | 2.50                         | 0.0003813              |
| 7965335   | DUSP6               | 2.56                         | 0.0001134              |
| 8075310   | LIF                 | 2.56                         | 0.0001682              |
| 8114572   | HBEGF               | 2.63                         | 0.0000311              |
| 8144786   | SLC7A2              | 2.70                         | 0.0000674              |
| 8149825   | STC1                | 2.70                         | 0.000361               |
| 8054712   | IL1A                | 2.70                         | 0.0015886              |
| 7943413   | BIRC3               | 2.78                         | 0.0002354              |
| 8122265   | TNFAIP3             | 2.86                         | 0.0001212              |
| 8025601   | ICAM1               | 3.23                         | 0.0000074              |

|         |       |      |           |
|---------|-------|------|-----------|
| 8131803 | IL6   | 3.70 | 0.0002961 |
| 8048864 | CCL20 | 4.55 | 0.0001772 |
| 8095697 | CXCL1 | 5.00 | 0.0000919 |
| 8054722 | IL1B  | 5.26 | 0.0000841 |
| 8095680 | IL8   | 7.14 | 0.0000225 |

## Supplementary Table 2

SGBS adipocytes on day 14 of adipogenic differentiation were treated with TRAIL (30 ng/ml) or vehicle. After 12 hours RNA was harvested and subjected to mRNA array analysis (Affymetrix, GeneChip Human Gene 1.0 ST Array). This table displays the genes that were differentially regulated by TRAIL in adipocytes. Downregulated genes are given in dark green, upregulated genes in red.

| Probe Set | Gene     | Fold-change<br>TRAIL vs veh. | Parametric p-<br>value |
|-----------|----------|------------------------------|------------------------|
| 8069689   | ADAMTS5  | 0.22                         | 0.0000071              |
| 8148059   | DEPTOR   | 0.27                         | 0.0000135              |
| 8099524   | LDB2     | 0.33                         | 0.0000419              |
| 7962559   | SLC38A4  | 0.35                         | 0.0002488              |
| 8112731   | F2RL2    | 0.40                         | 0.003729               |
| 8051583   | CYP1B1   | 0.41                         | 0.0003349              |
| 7983630   | FGF7     | 0.41                         | 0.000522               |
| 7907160   | ATP1B1   | 0.42                         | 0.002565               |
| 7958262   | TCP11L2  | 0.44                         | 0.0051185              |
| 8095110   | KIT      | 0.44                         | 0.0000006              |
| 8104663   | CDH6     | 0.44                         | 0.0001977              |
| 8056257   | FAP      | 0.44                         | 0.0007663              |
| 8131844   | GPNMB    | 0.44                         | 0.0002771              |
| 8162388   | OMD      | 0.45                         | 0.0028756              |
| 8091537   | IGSF10   | 0.45                         | 0.0005825              |
| 8103166   | SH3D19   | 0.45                         | 0.0003881              |
| 8152703   | FBXO32   | 0.45                         | 0.0059712              |
| 7961580   | LMO3     | 0.46                         | 0.0065096              |
| 7921882   | OLFML2B  | 0.46                         | 0.0013561              |
| 8115397   | C5orf4   | 0.47                         | 0.0002006              |
| 7916493   | PPAP2B   | 0.47                         | 0.00009                |
| 7985317   | KIAA1199 | 0.47                         | 0.0009076              |
| 7919815   | CTSK     | 0.47                         | 0.0001969              |
| 8057677   | SLC40A1  | 0.47                         | 0.0004593              |
| 8152119   | NCALD    | 0.48                         | 0.0002567              |
| 7980908   | FBLN5    | 0.48                         | 0.0003805              |
| 8013341   | MFAP4    | 0.48                         | 0.0002866              |
| 8103415   | FAM198B  | 0.49                         | 0.0008911              |
| 7965403   | LUM      | 0.51                         | 0.000527               |
| 8090193   | HEG1     | 0.52                         | 0.0013675              |
| 7924996   | C1orf198 | 0.52                         | 0.0006266              |
| 8121601   | FAM26E   | 0.53                         | 0.0018403              |
| 8051028   | NA       | 0.53                         | 0.0459626              |
| 7965410   | DCN      | 0.53                         | 0.0015297              |
| 7966026   | NUAK1    | 0.53                         | 0.0029503              |
| 8104758   | NPR3     | 0.55                         | 0.0042965              |
| 8140971   | SAMD9L   | 0.57                         | 0.0023627              |
| 8002379   | NA       | 1.56                         | 0.0270812              |
| 7995258   | ZNF267   | 1.59                         | 0.0478315              |

|         |           |       |           |
|---------|-----------|-------|-----------|
| 7973067 | PNP       | 1.85  | 0.0039919 |
| 7950983 | CHORDC1   | 1.92  | 0.0238685 |
| 7954090 | EMP1      | 1.96  | 0.0013212 |
| 8075635 | TIMP3     | 2.04  | 0.0013826 |
| 7930008 | NOLC1     | 2.08  | 0.0008748 |
| 8122265 | TNFAIP3   | 2.13  | 0.0000053 |
| 8045688 | TNFAIP6   | 2.13  | 0.000046  |
| 7943218 | PANX1     | 2.13  | 0.0000973 |
| 8066513 | SDC4      | 2.13  | 0.0001391 |
| 7992789 | TNFRSF12A | 2.17  | 0.0014676 |
| 8169603 | LONRF3    | 2.22  | 0.0007681 |
| 8006433 | CCL2      | 2.27  | 0.0002569 |
| 8021169 | LIPG      | 2.27  | 0.0003352 |
| 8085914 | SLC4A7    | 2.33  | 0.0001162 |
| 8116418 | GFPT2     | 2.44  | 0.0004897 |
| 8138289 | ETV1      | 2.50  | 0.0000652 |
| 7934979 | ANKRD1    | 2.50  | 0.0000766 |
| 8095680 | IL8       | 2.70  | 0.0000847 |
| 8131803 | IL6       | 2.70  | 0.0005874 |
| 7958884 | OAS1      | 2.78  | 0.0000759 |
| 8149865 | EBF2      | 2.78  | 0.000077  |
| 8150076 | DUSP4     | 2.86  | 0.0000228 |
| 8105267 | ITGA2     | 2.94  | 0.0001832 |
| 8162531 | NA        | 3.13  | 0.0000414 |
| 8091411 | TM4SF1    | 3.13  | 0.0002427 |
| 8104901 | IL7R      | 3.33  | 0.0004432 |
| 7995783 | MT2A      | 3.57  | 0.0001384 |
| 8114797 | SPRY4     | 3.70  | 0.0000041 |
| 7974366 | PTGER2    | 3.70  | 0.0001796 |
| 8135069 | SERPINE1  | 3.85  | 0.0000412 |
| 7906919 | RGS4      | 3.85  | 0.0002209 |
| 7923547 | CHI3L1    | 4.17  | 0.0000349 |
| 8141016 | TFPI2     | 7.69  | 0.0000008 |
| 8021635 | SERPINB2  | 12.05 | 0.0000064 |
| 8048864 | CCL20     | 20.00 | 0.0002311 |

## Supplementary Figure 1

**A**

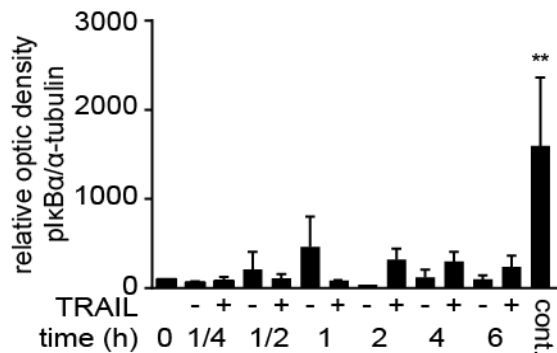

**B**

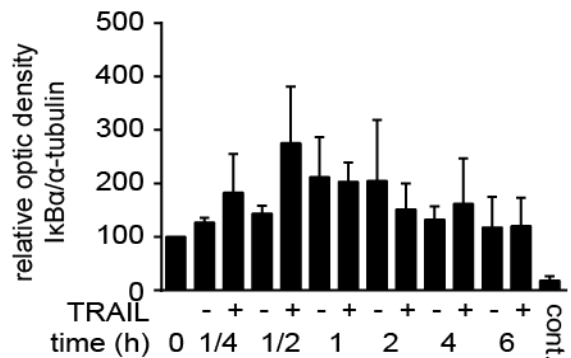

### Supplementary Figure 1: TRAIL induces IκBα phosphorylation

SGBS adipocytes on day 14 of adipogenic differentiation were treated with TRAIL (30 ng/ml) or vehicle for the indicated times. Protein was isolated and the phosphorylation of IκBα as well as the expression of IκBα and α-tubulin were analyzed by Western blot. Relative levels of pIκBα, IκBα and α-tubulin were analyzed using Image J (<https://imagej.nih.gov/ij>). The levels of pIκBα (**A**) and IκBα (**B**) were first normalized to α-tubulin and then to the appropriate control (0 hours). Displayed are the means and SEM of 3 independent experiments. One-way ANOVA and Dunnett's multiple comparison were used to test for statistical significance. \*\*, p < 0.01.

## Supplementary Figure 2

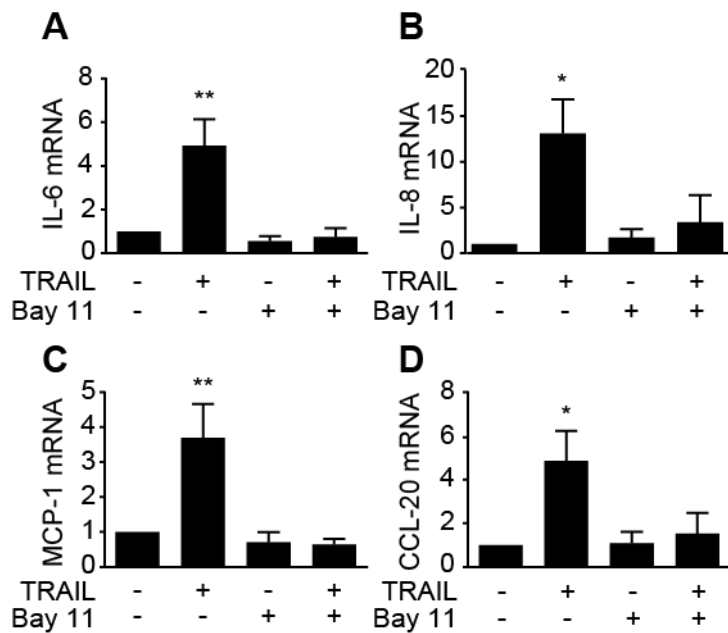

### Supplementary Figure 2: Bay 11 inhibits the TRAIL-induced up-regulation of cytokines and chemokines in adipocytes

SGBS adipocytes on day 14 of adipogenic differentiation were treated with TRAIL (30 ng/ml) or vehicle in the absence or presence of the inhibitor Bay 11 (10  $\mu$ M). After 6 hours, the expression of IL-6 (A), IL-8 (B), MCP-1 (C) and CCL-20 (D) was analyzed by qPCR. The mRNA levels were normalized to HPRT. Depicted is the means and SEM of 3 independent experiments. One-way ANOVA and Dunnett's multiple comparison were used to test for statistical significance. \*,  $p < 0.05$ , \*\*,  $p < 0.01$ .

## Supplementary Figure 3

**A**

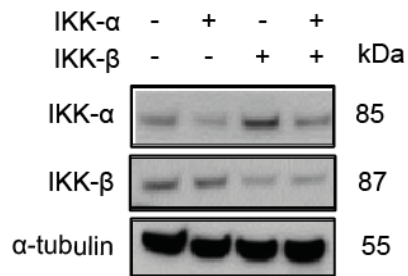

**B**

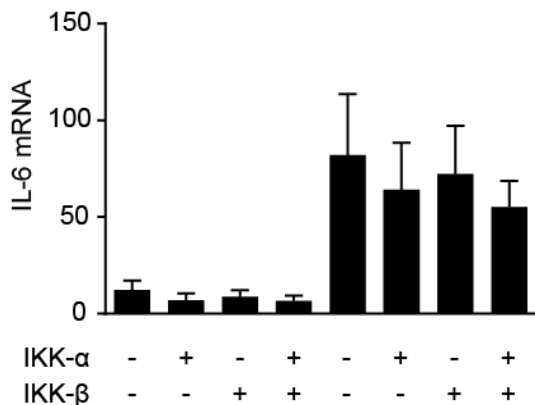

**C**

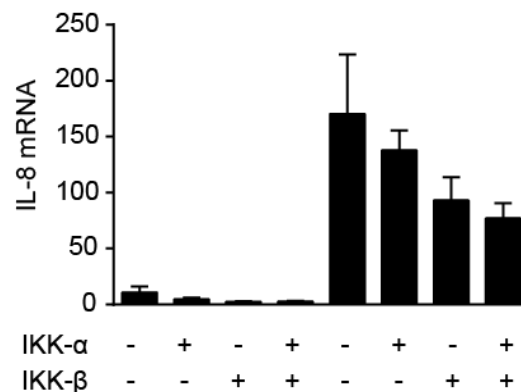

**D**

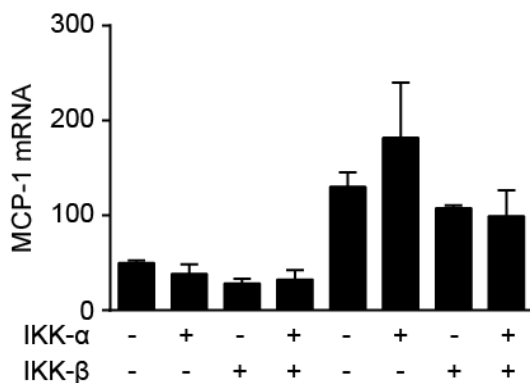

**E**

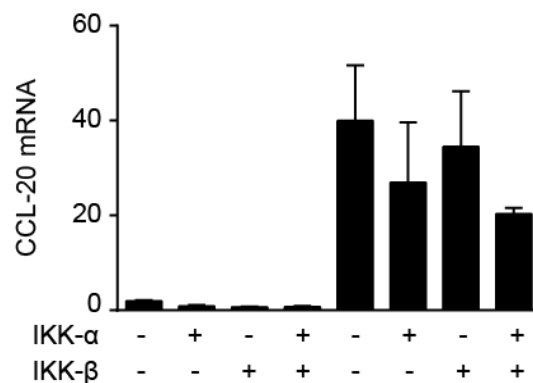

### Supplementary Figure 3: Knockdown of IKK- $\alpha$ and IKK- $\beta$ dampens the TRAIL-induced up-regulation of cytokines and chemokines in preadipocytes

SGBS preadipocytes were transfected with siRNA constructs against IKK- $\alpha$  and IKK- $\beta$  as published previously (IKK- $\alpha$ : 5'-GGA UGU UGG UGG AAA GAU A-3'; IKK- $\beta$ : 5'-GGG AAC AAG ACC AGA GUU U-3'; Eurogentech, Lüttich, Belgium)(Jain et al. 2012, Neoplasia 14(3):178-89). Cells were seeded in 12-well plates with 50.000 cells per well and transfected the following day with 50 nM siRNA and 2.5  $\mu$ l of Lipofectamin 2000 (Bio-Techne, Wiesbaden-Nordenstadt, Germany) per well. After 72 hours, the knockdown was controlled by Western blot (A). One representative blot out of three performed blots is presented.  $\alpha$ -tubulin was used as a loading control. Also after 72 hours, the cells were treated with TRAIL (30 ng/ml) or vehicle. After another 6 hours, IL-6 (B), IL-8 (C), MCP-1 (D) and CCL-20 (E) expression was analyzed by qPCR. The mRNA levels were normalized to the gene HPRT. Depicted are the means and SEM of 4 independent experiments.



## Supplementary Figure 4

Full-length blot of caspase-8, short exposure

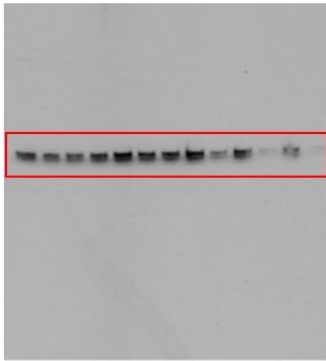

Full-length blot of caspase-3, short exposure

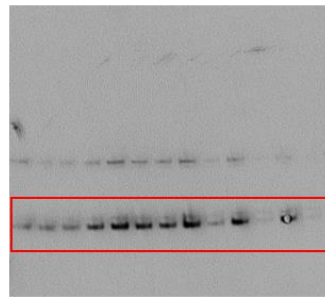

remaining caspase-8

Full-length blot of caspase-8, long exposure

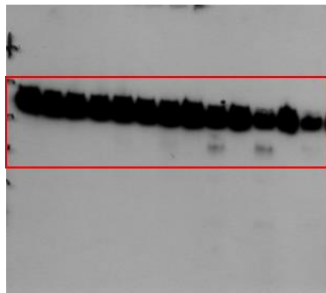

Full-length blot of caspase-3, long exposure

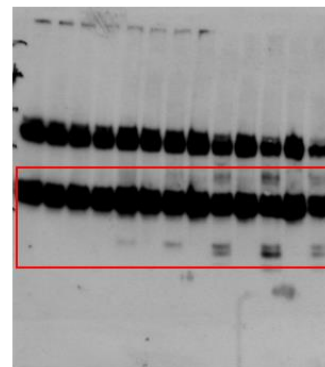

remaining caspase-8

Full-length blot of  $\alpha$ -tubulin

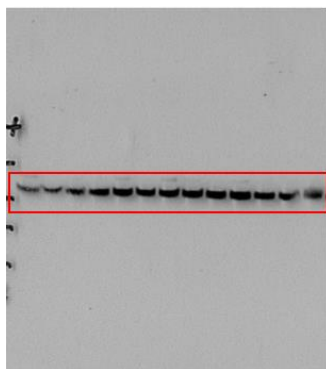

## Supplementary Figure 4

The full-length blots for main Figure 4 are given. Bands shown in the main manuscript are marked in red. Membrane was first used for detection of caspase-8, then reprobred for detection of caspase-3.

## Supplementary Figure 5

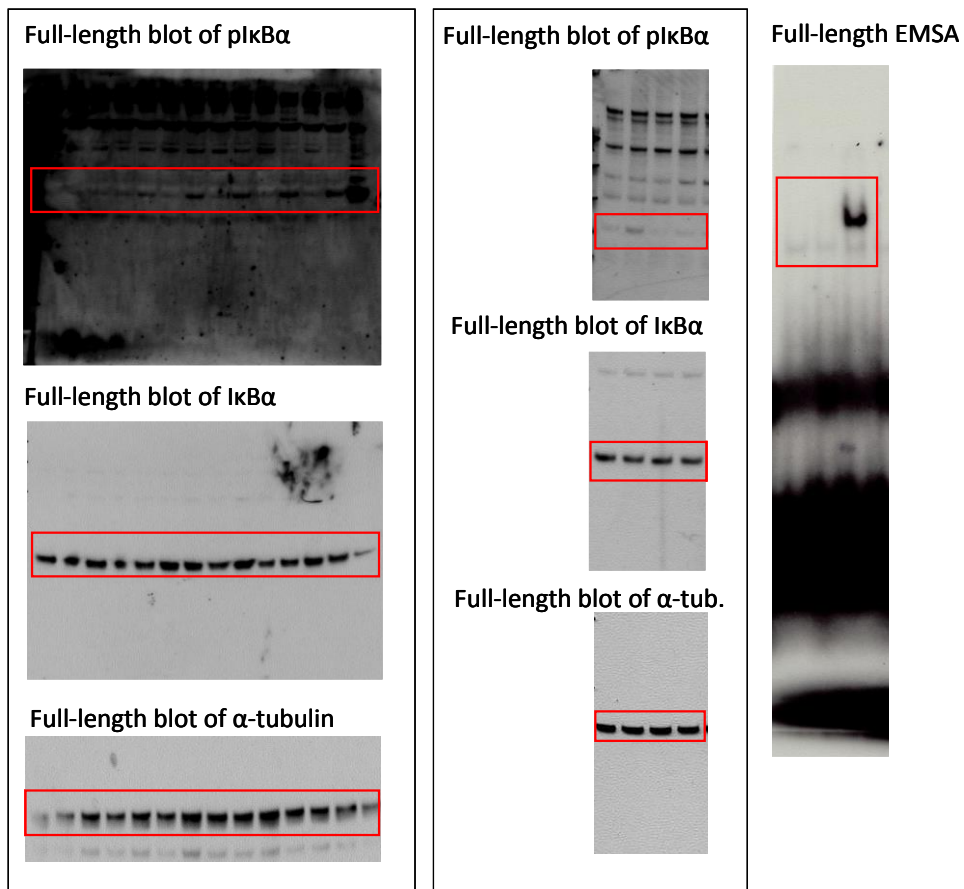

### Supplementary Figure 5

The full-length blots for main Figure 5 are given. Bands shown in the main manuscript are marked in red. pIκBα antibody is known to produce unspecific bands.

**Supplementary Figure 6**

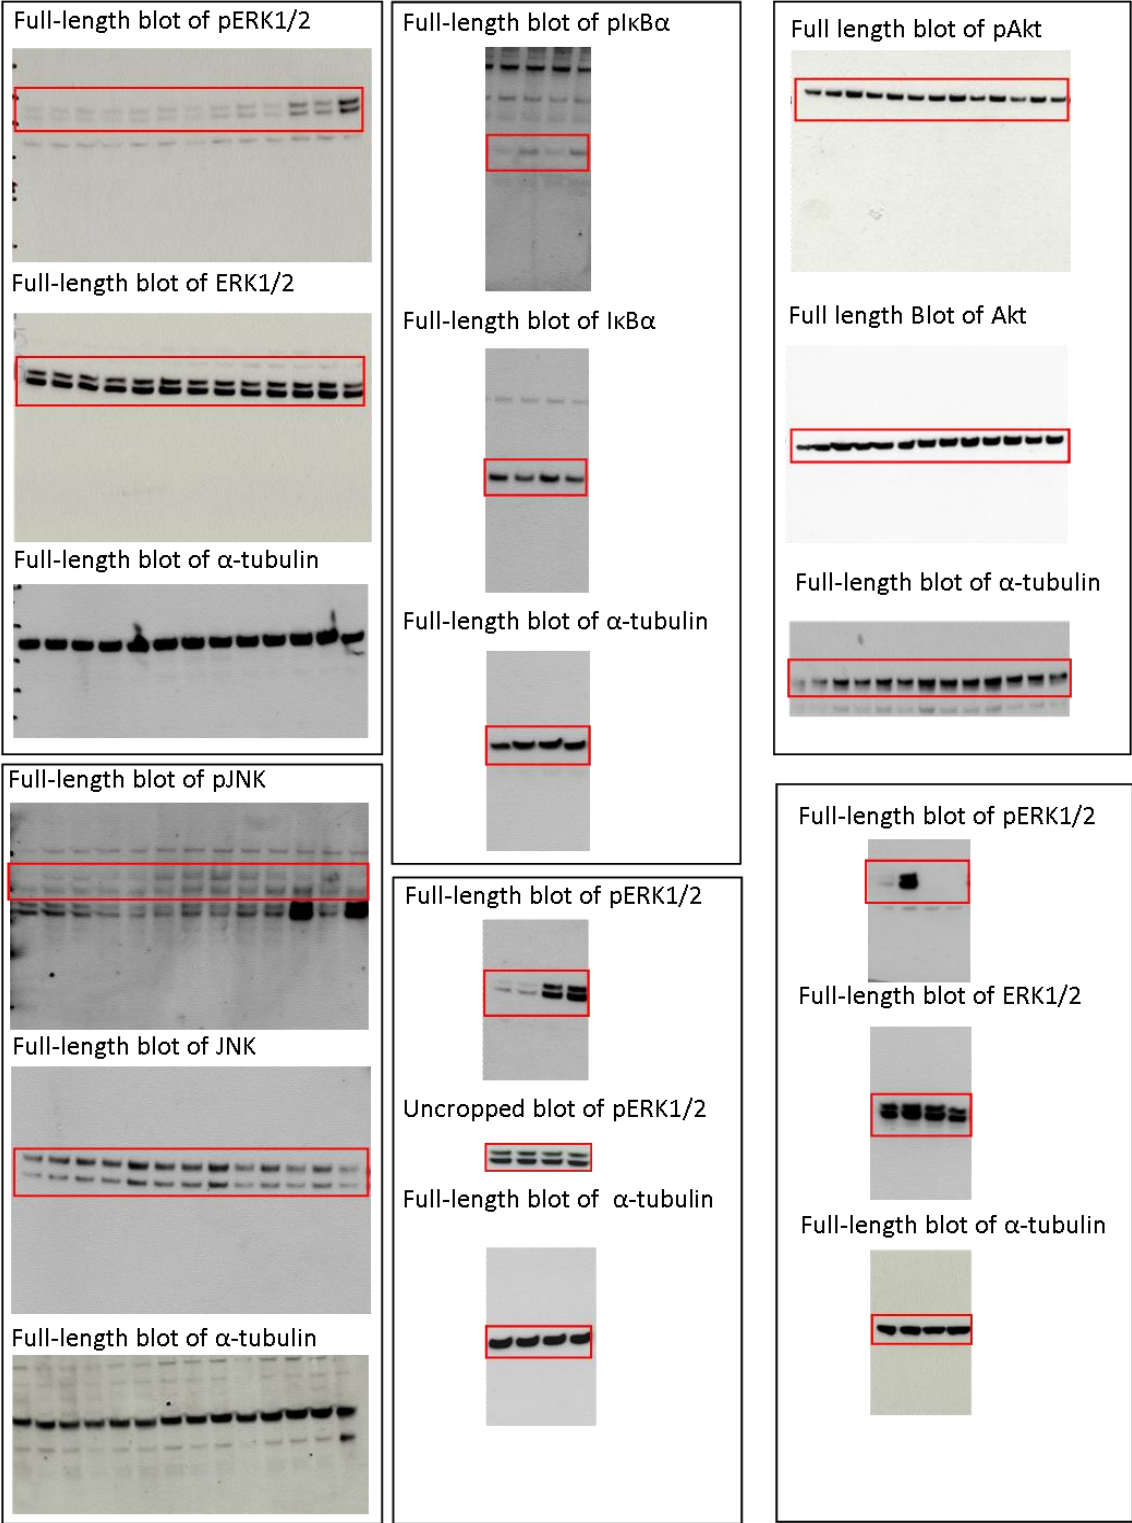

**Supplementary Figure 6**

The full-length blots for main Figure 6 are given. Bands shown in the main manuscript are marked in red. pJNK antibody showed cross-reactivity to pERK1/2.

## Supplementary Figure 7

Full-length blot of IKK- $\beta$

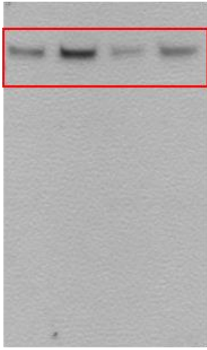

Full-length blot of IKK- $\alpha$

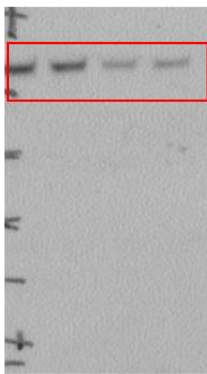

Full-length blot of  $\alpha$ -tubulin

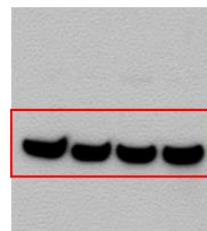

### Supplementary Figure 7

The full-length blots for Supplementary Figure 3 are given. Used bands were marked red.
